# Supplementary material for: Unusual genome expansion and transcription suppression in ectomycorrhizal Tricholoma matsutake by insertions of transposable elements
Source: PubMed Central journal article supplement (PMC6980582; doi:10.1371/journal.pone.0227923), 2020-01-24
Supplement: pone.0227923.s001.pdf [file pone.0227923.s001.pdf]

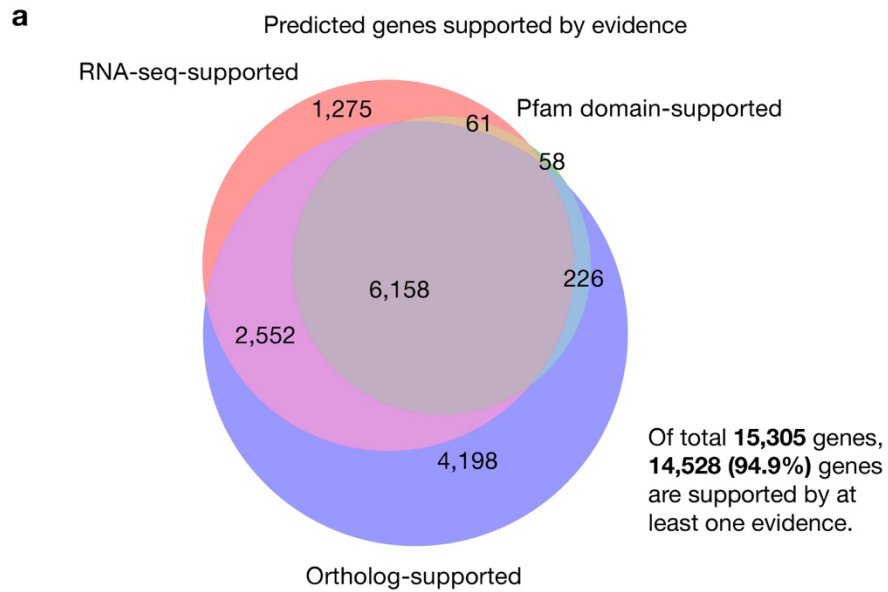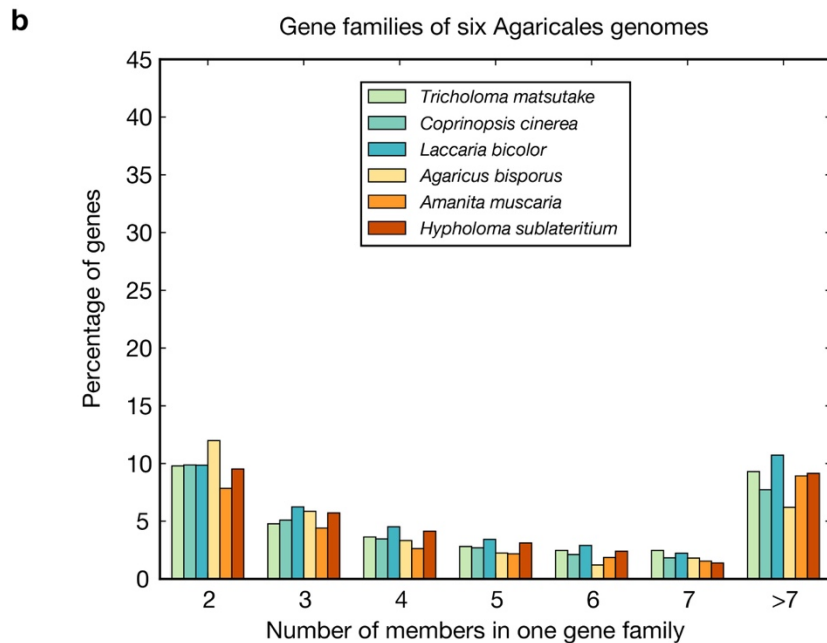

**Fig A | Gene prediction quality assessment and allele genes estimation.** **a.** The predicted genes were examined for their reliability using RNA-seq, Pfam domains, and orthologs within 37 Agaricomycetes genomes. For RNA-seq, we accounted for the genes with >1 FPKM in at least one development stage. When a gene family includes members from more than five genomes, we considered those members are reliable (not pseudogene). **b.** The frequencies of gene members in a gene family.

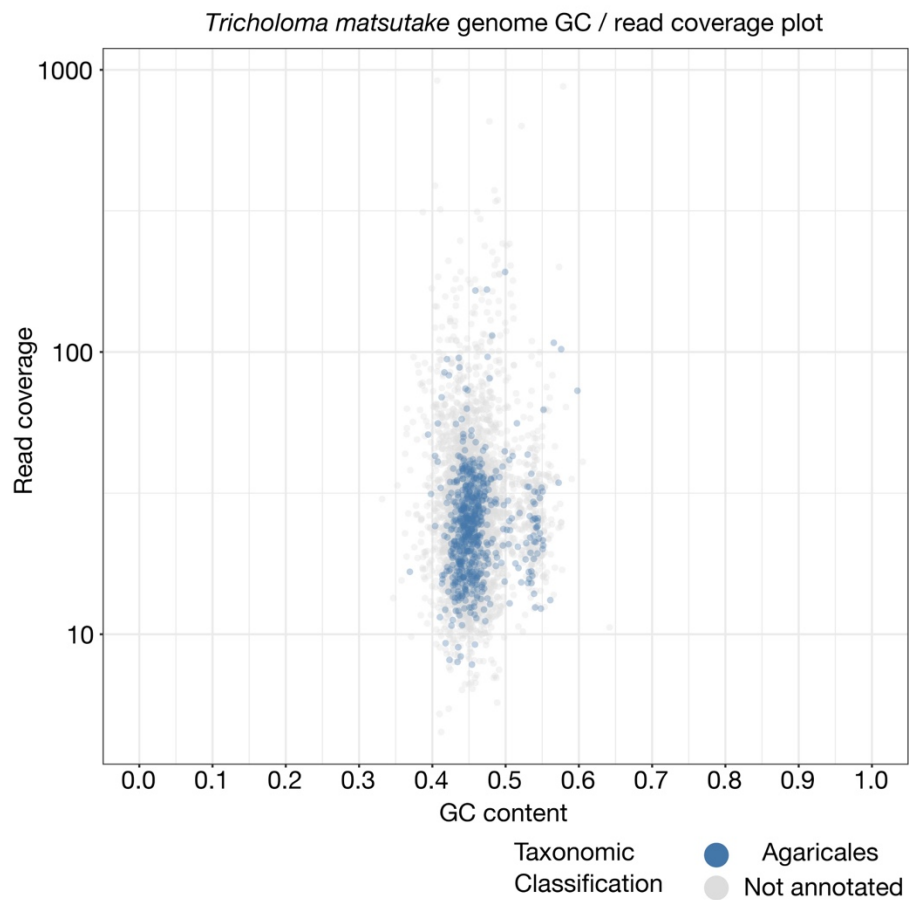

**Fig B | A scatter plot of GC and read coverage of the *Tricholoma matsutake* genome.** Each point indicates a scaffold marked with a color according to its taxonomic assignment (order level) which was made based on BLASTn search against the NCBI *nt* database.

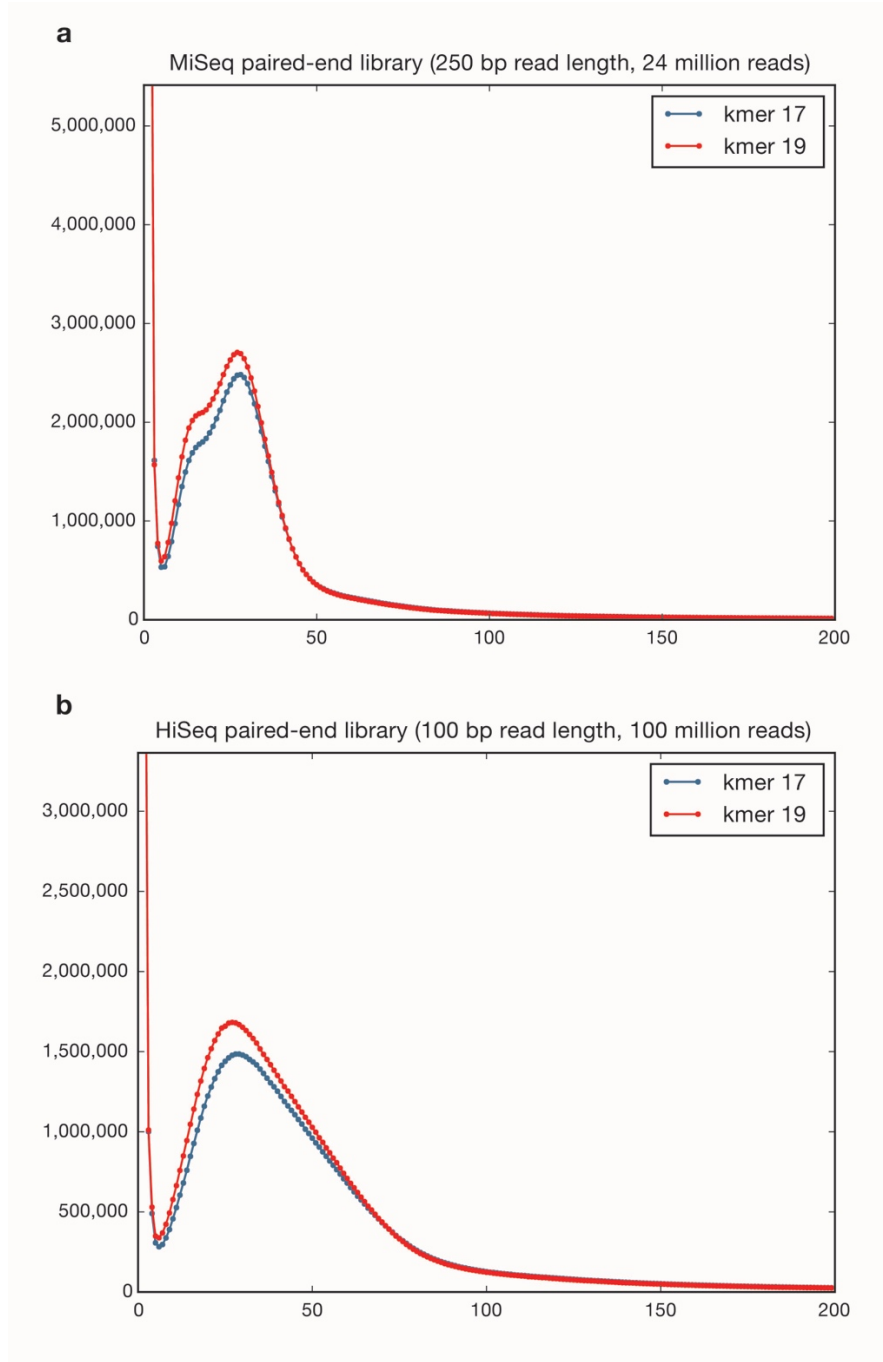

**Fig C | K-mer frequency of genomic DNA sequencing.** Two paired-end sequencing libraries were used.

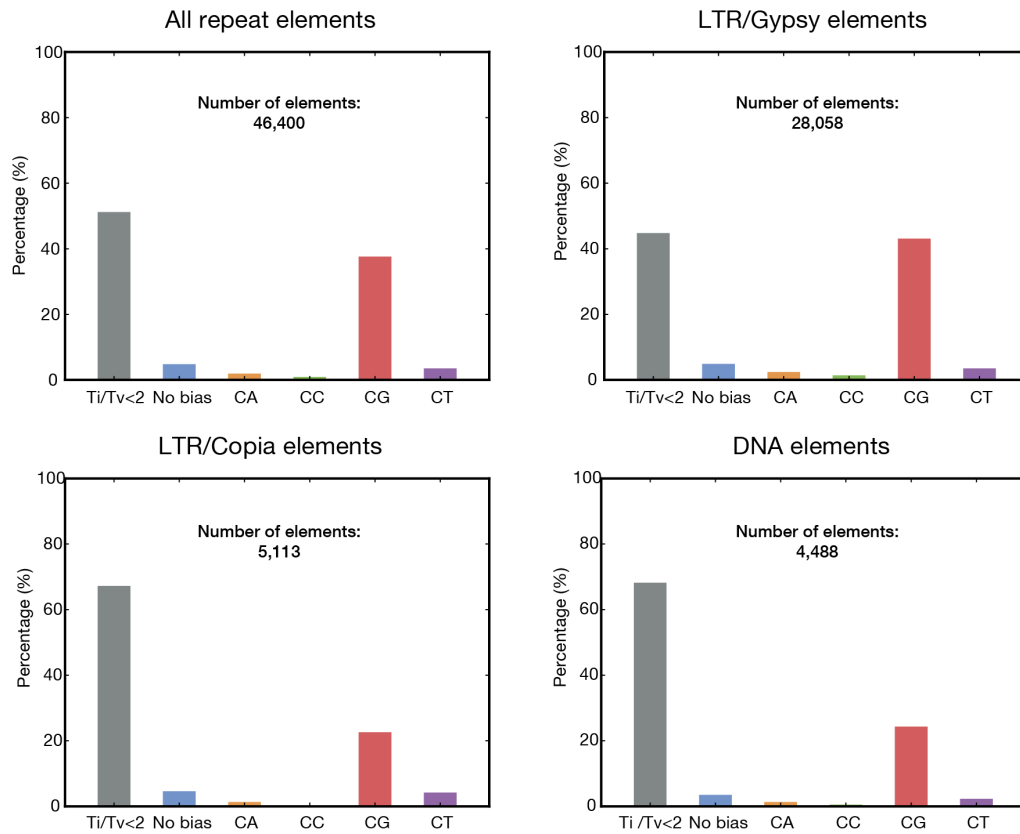

**Fig D | The evidence of repeat-induced point mutation in the *T. matsutake* genome.** The repeat elements showing transition/transversion ratio >2 were classified according to the dinucleotide hypermutation bias to see which dinucleotide is preferred in C to T transition during RIP process.

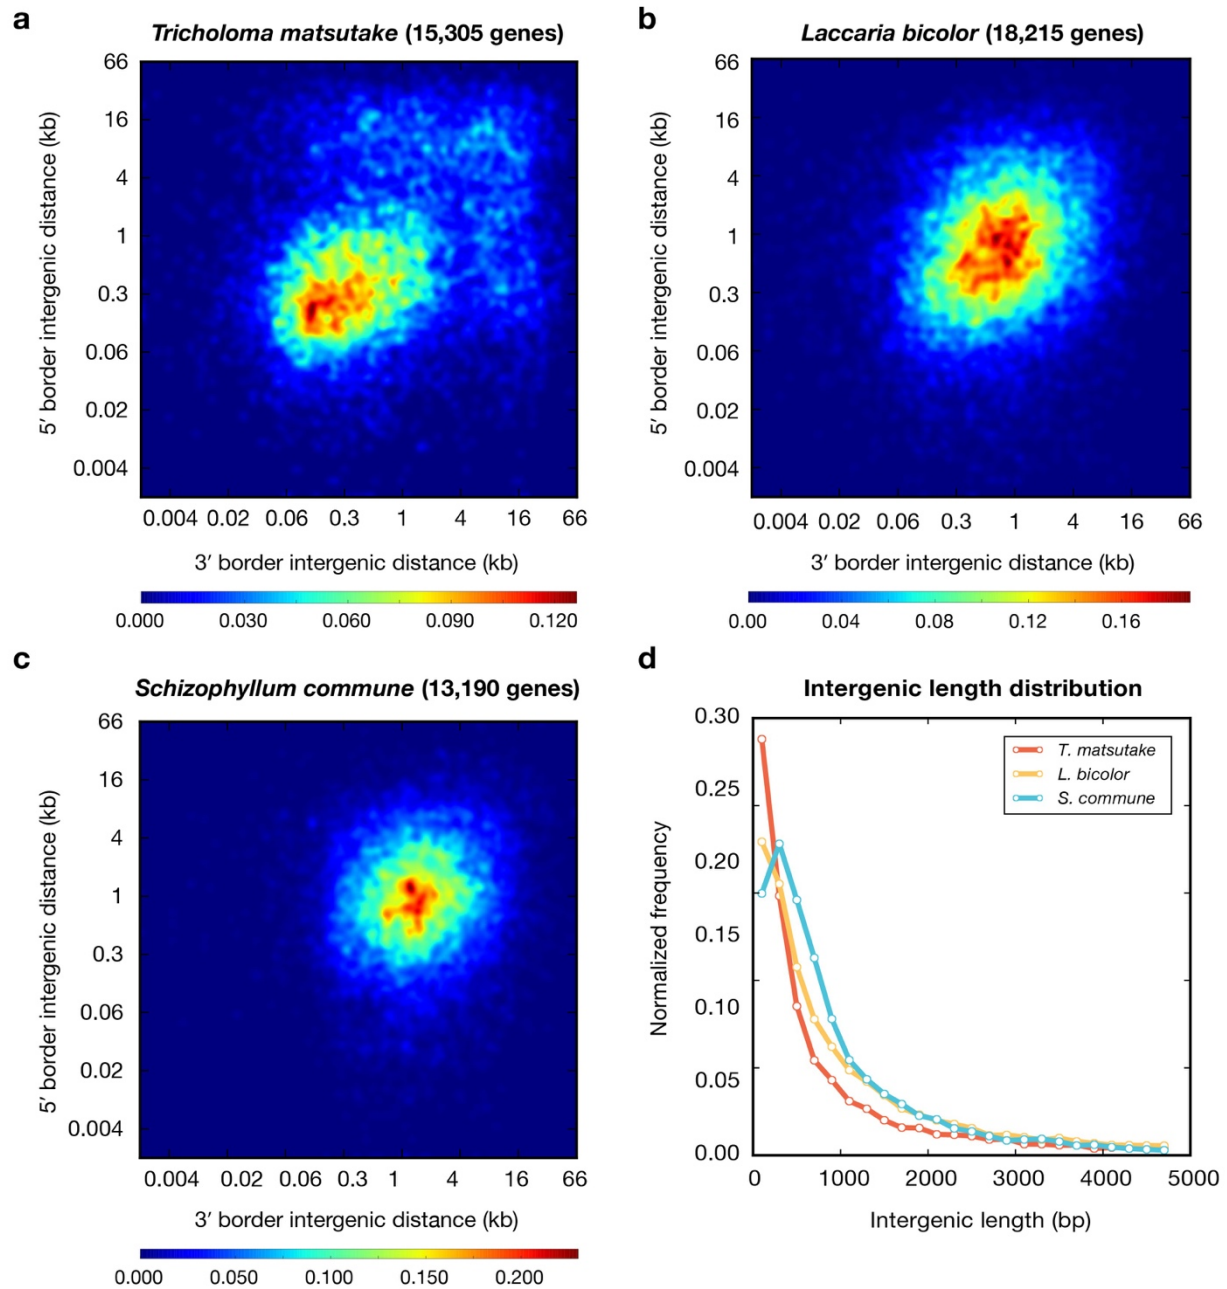

**Fig E | Intergenic length distribution.** a–c. GFF3 files were used to obtain the distances to neighbor genes. Both ends of genes of scaffolds were not considered because they had only one side border. Two-dimensional histograms were calculated with 1000 bins and Gaussian filter was used to smooth the heatmaps. d. Intergenic length distribution of three mushroom genomes. Frequency values were normalized by total gene counts of the genomes.

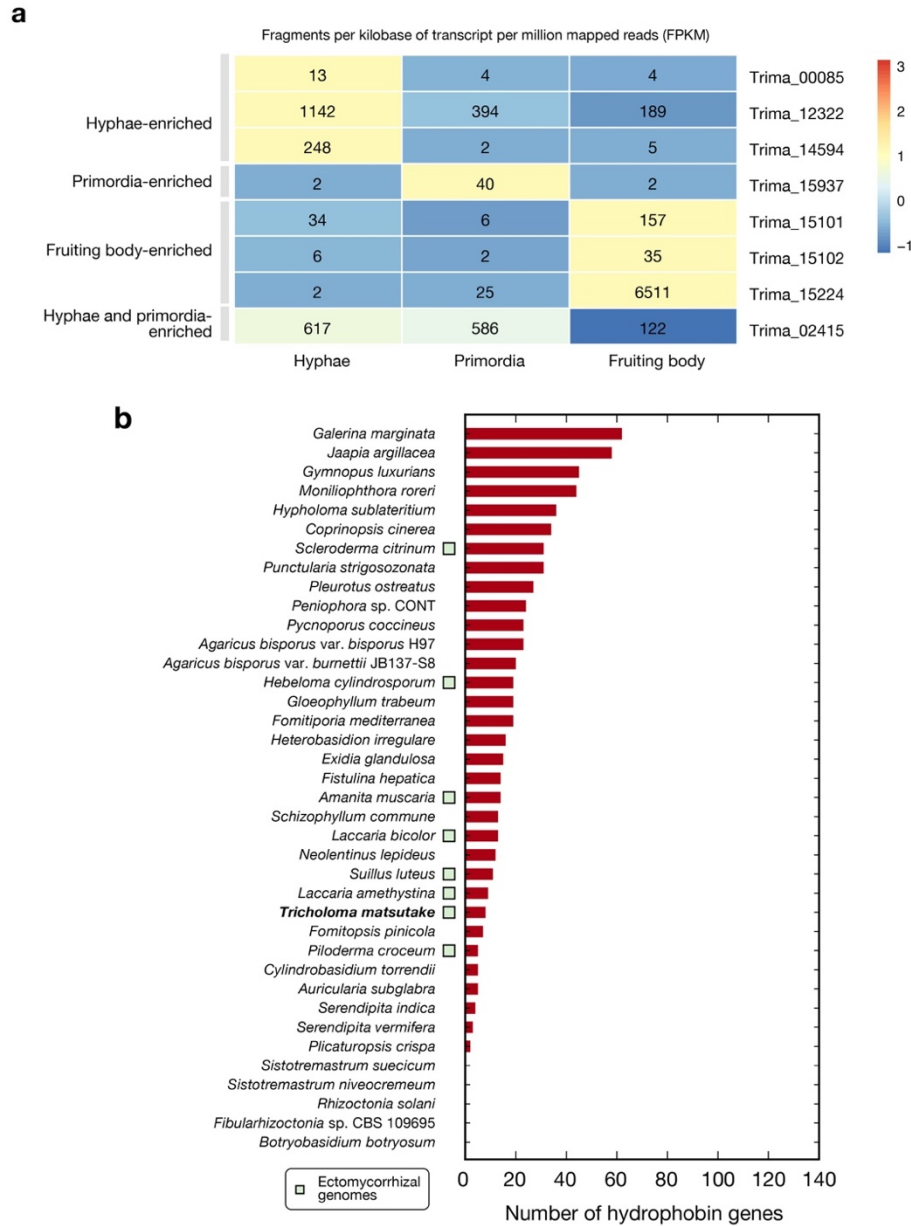

**Fig F | Hydrophobin gene expression at the three developmental stages and the gene frequencies of the 37 Agaricomycetes genomes.** Differentially expressed gene types were determined based on logFC ( $>1$  or  $<-1$ ) estimated by IsoDE2, based on bootstrapping of aligned reads. When two conditions were more expressed than the other, but there was no difference between them ( $-1 < \logFC < 1$ ), we assigned this gene as co-overexpressed in those two conditions. Scaled values based on row Z-scores were used to fill each cell. The genomes list is shown in Supplementary Table S3.

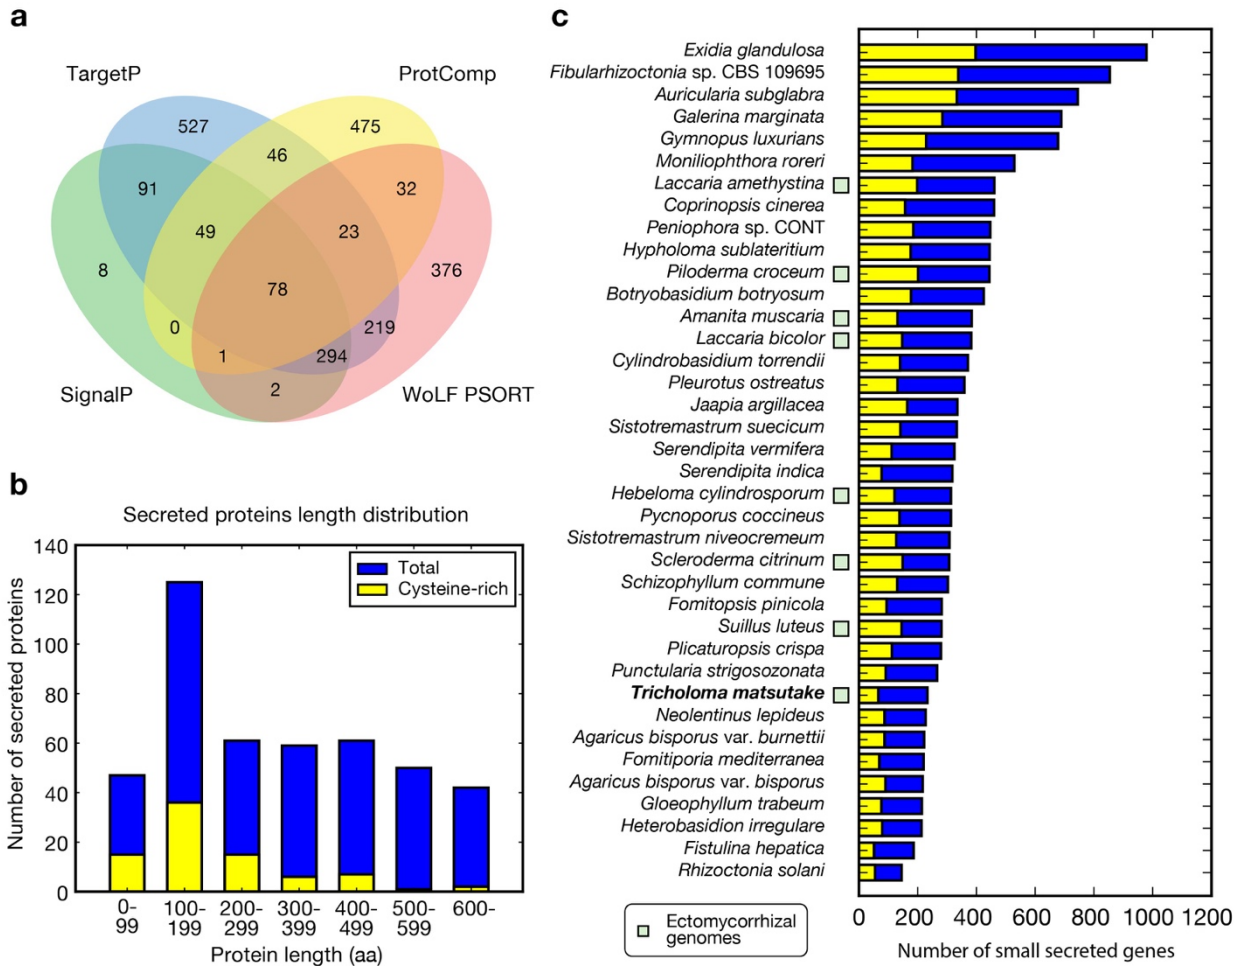

**Fig G | Secreted protein genes.** **a.** The Venn diagram of predicted secreted protein genes predicted by four different programs. **b.** Length distribution of secreted proteins of the *T. matsutake* genome. Cysteine-rich protein sequences are determined when they contain >3% cysteines in the sequence. **c.** Secreted small protein genes (<300 aa) of 38 Agaricomycetes genomes.

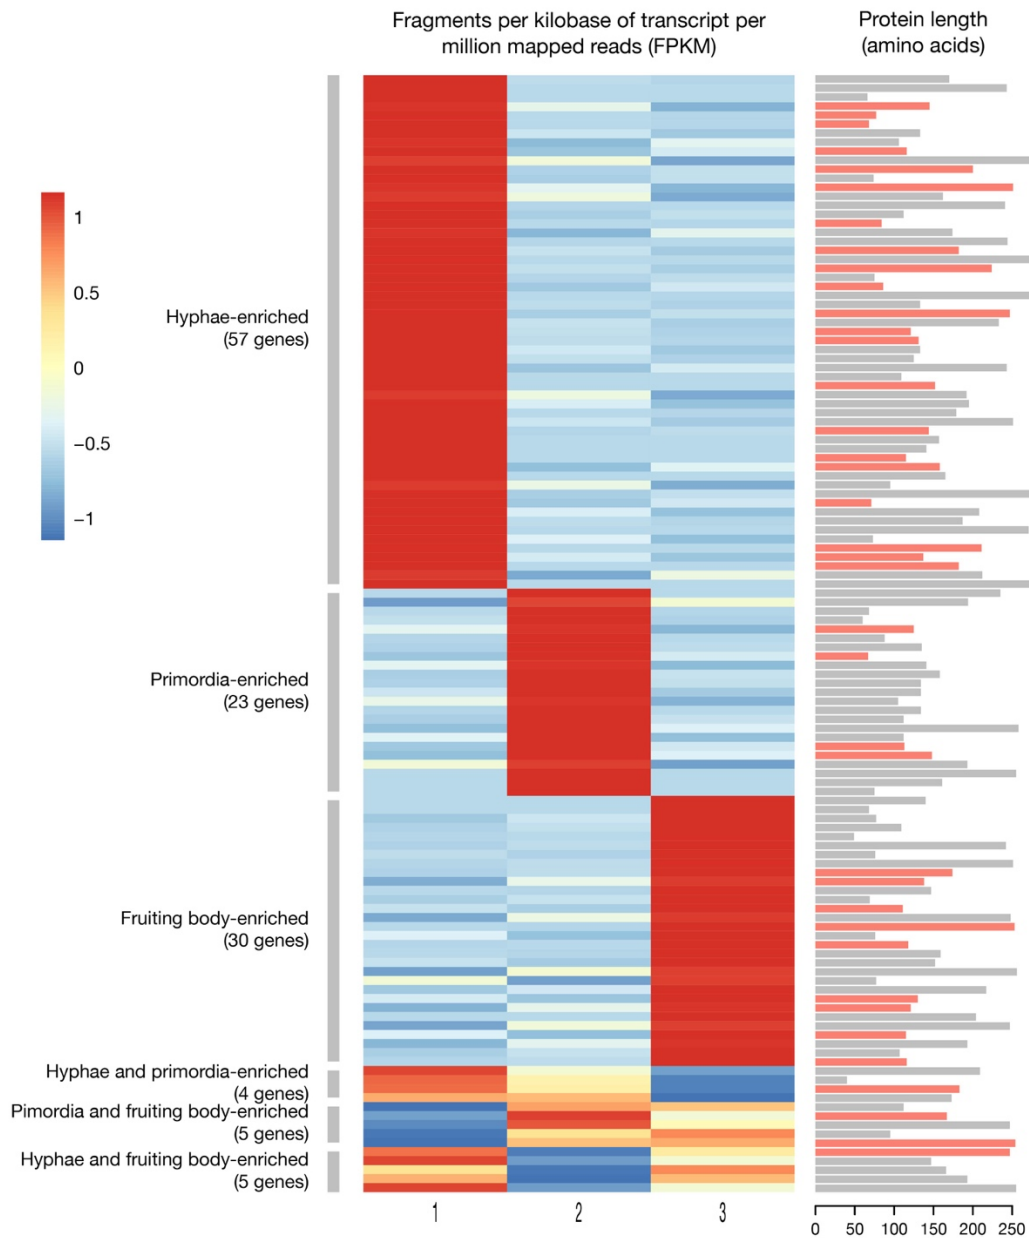

**Fig H | Differentially expressed small secreted protein genes.** Differentially expressed genes were determined by IsoDE2, based on bootstrapping of aligned reads. Less than 300 aa length of proteins were considered. Cysteine-rich proteins (>3% of a protein sequence) were marked with light pink color at the protein length bars. Scaled values based on row Z-scores were used to fill each cell.



Gene tree of IstB-like ATP binding protein (PF01695)

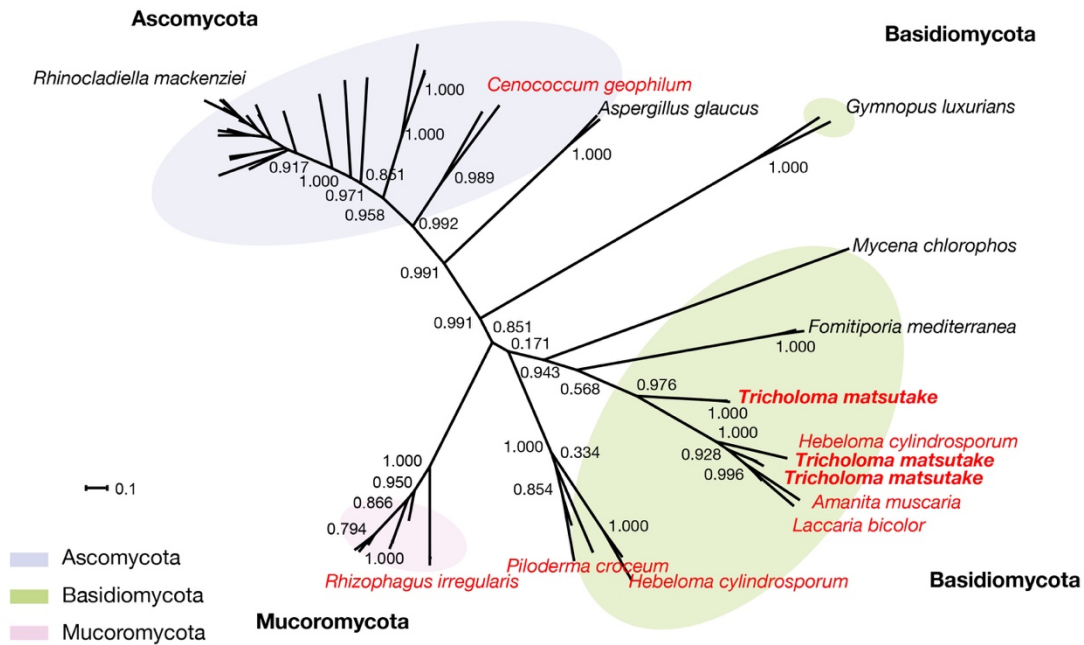

**Fig I | Gene tree of IstB-like ATP binding protein.** The 50 homologs were retrieved from BLAST search against the NCBI *nr* database. The gene tree was built using Mafft 7.273 for multiple sequence alignment and FastTree for tree building. The scale bar that represents the mean number of amino acid substitutions per site is shown. Local support values computed with the Shimodaira-Hasegawa test are indicated. Mycorrhizal species are marked in red color.

Gene tree of cadmium resistance transporter (PF03596)

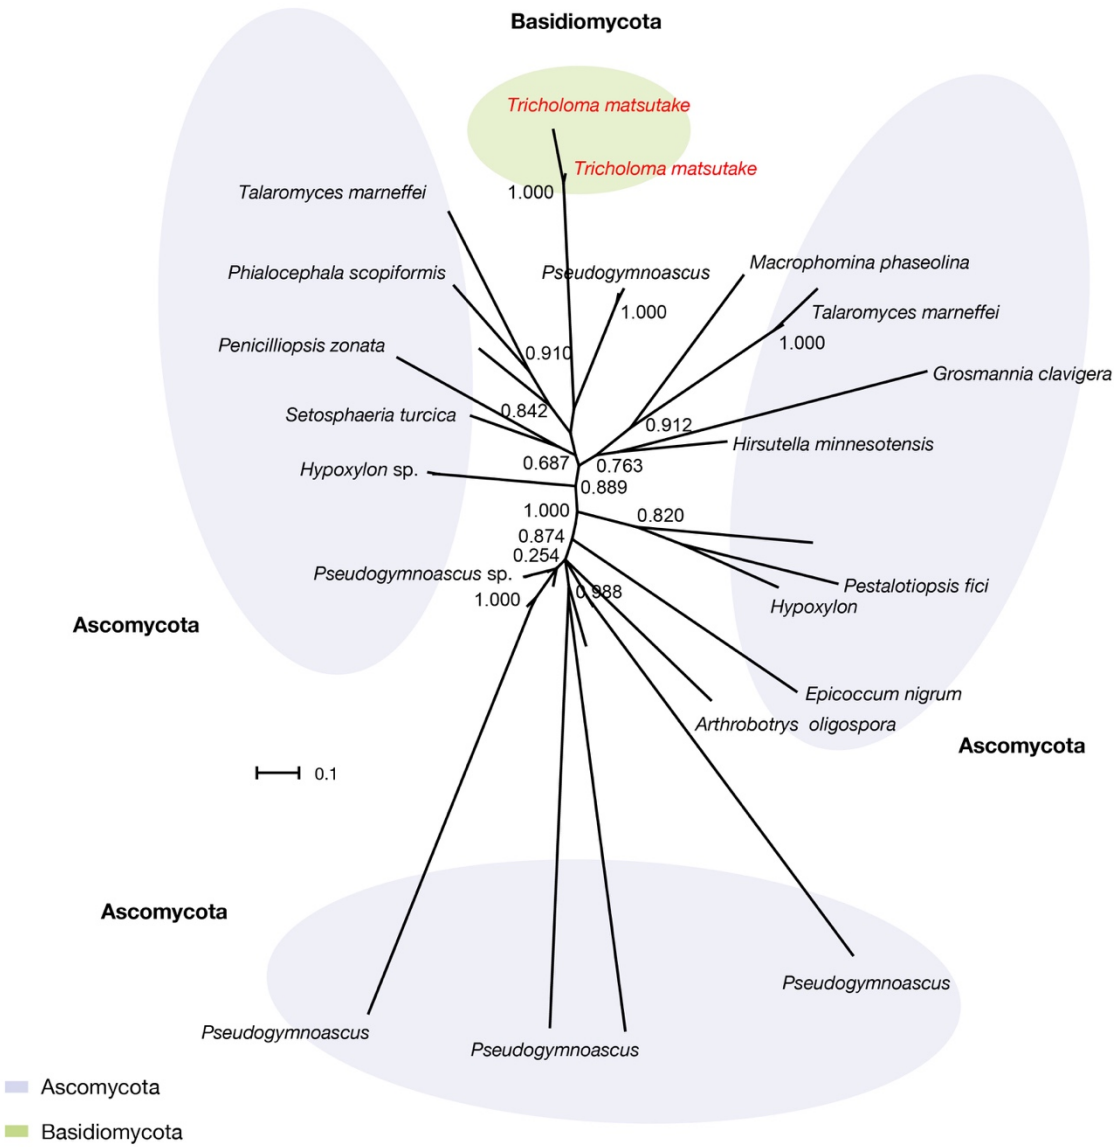

**Fig J | Gene tree of cadmium resistance transporter.** The 50 homologs were retrieved from BLAST search against the NCBI *nr* database. The gene tree was built using Mafft 7.273 for multiple sequence alignment and FastTree for tree building. Local support values computed with the Shimodaira-Hasegawa test are indicated. The scale bar that represents the mean number of amino acid substitutions per site is shown. *Tricholoma matsutake* is marked with red color.

Gene tree of Neprosin (PF03080)

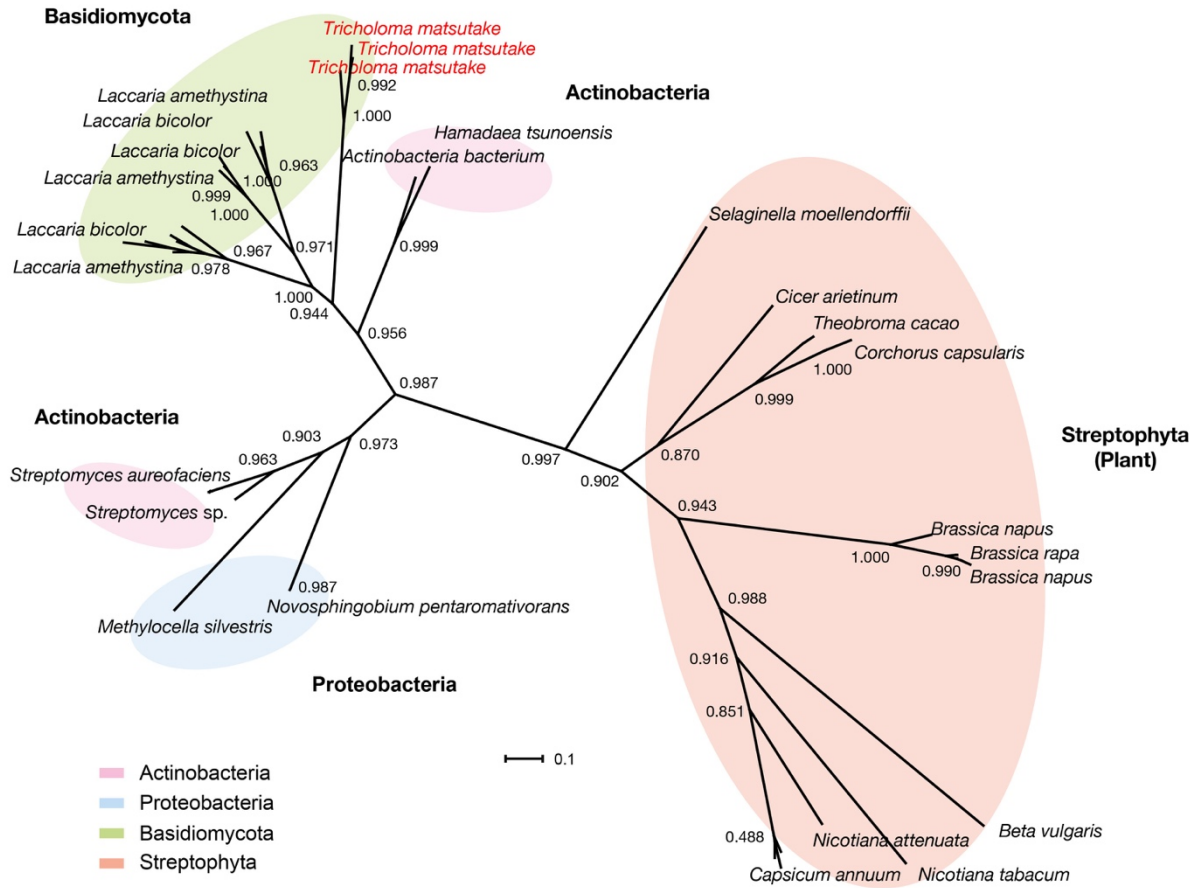

**Fig K | Gene tree of neprosin.** The 50 homologs were retrieved from BLAST search against the NCBI *nr* database. The gene tree was built using Mafft 7.273 for multiple sequence alignment and FastTree for tree building. Local support values computed with the Shimodaira-Hasegawa test are indicated for each branch. The scale bar that represents the mean number of amino acid substitutions per site is shown. *Tricholoma matsutake* is marked with red color.

Gene tree of carbohydrate binding domain (PF10645, CBM52)

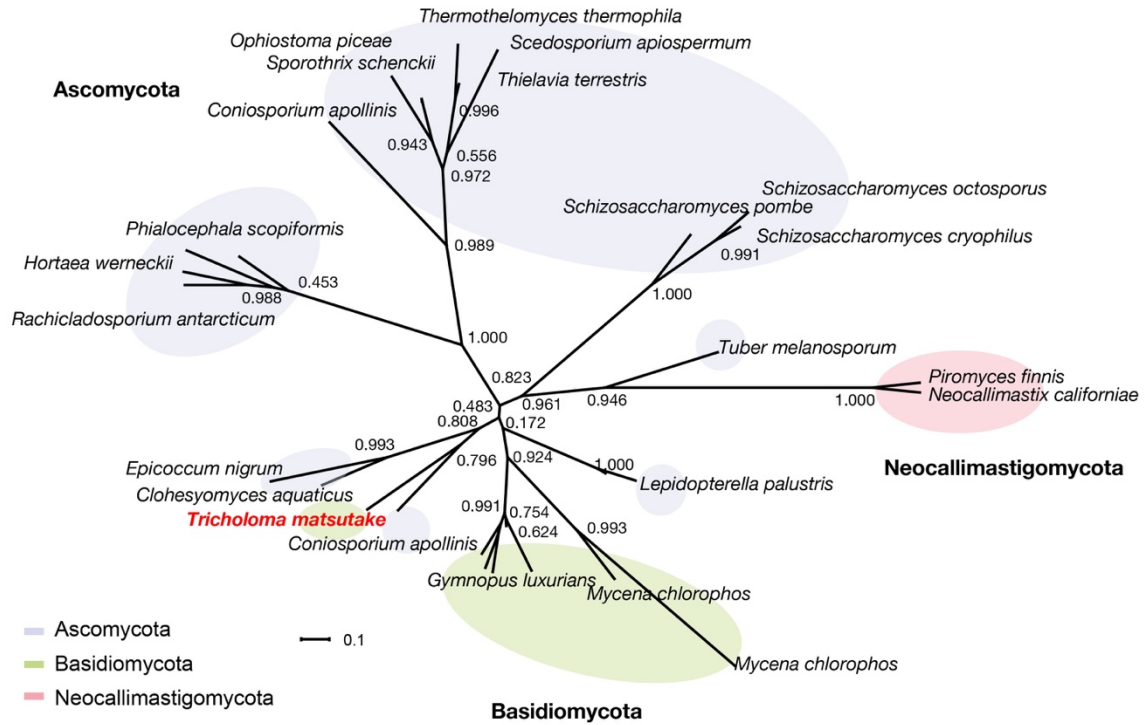

**Fig L | Gene tree of carbohydrate binding domain.** The 30 homologs were retrieved from BLAST search against the NCBI *nr* database. The gene tree was built using Mafft 7.273 for multiple sequence alignment and FastTree for tree building. Local support values computed with the Shimodaira-Hasegawa test are indicated for each branch. The scale bar that represents the mean number of amino acid substitutions per site is shown. *Tricholoma matsutake* is marked with red color.

**Table A. Target proteins responsible for genome defense by fungi**

| <b>Mechanism</b>                  | <b>Name</b>           | <b>Description</b>                  | <b>Source organism</b>    | <b>Length (aa)</b> | <b>GenBank accession</b> |
|-----------------------------------|-----------------------|-------------------------------------|---------------------------|--------------------|--------------------------|
| Repeat-induced point mutation     | Rid/Dim2 <sup>1</sup> | DNA methyltransferase               | <i>Neurospora crassa</i>  | 1454               | AAK49954.1               |
|                                   | Masc1 <sup>2</sup>    | C5-DNA methyltransferase            | <i>Ascobolus immersus</i> | 537                | AAC49849.1               |
|                                   | Masc2 <sup>3</sup>    | C5-DNA methyltransferase            | <i>Ascobolus immersus</i> | 1356               | AAC03766.1               |
| Meiotic silencing by unpaired DNA | Sad-1 <sup>4</sup>    | RNA dependent RNA polymerase        | <i>Neurospora crassa</i>  | 1638               | EAA35012.3               |
|                                   | Sms-3 <sup>4</sup>    | dicer-like protein                  | <i>Neurospora crassa</i>  | 1584               | EAA32662.1               |
|                                   | Sms-2 <sup>4</sup>    | meiotic silencing suppressor        | <i>Neurospora crassa</i>  | 989                | EAA29350.1               |
| Quelling                          | Qde-1 <sup>4</sup>    | RNA-dependent RNA polymerase        | <i>Neurospora crassa</i>  | 1402               | EAA29811.1               |
|                                   | Dcl2 <sup>4</sup>     | dicer-like protein                  | <i>Neurospora crassa</i>  | 1396               | XP_963538.3              |
|                                   | Qde2 <sup>5</sup>     | post-transcriptional gene silencing | <i>Neurospora crassa</i>  | 938                | AAF43641.1               |

**Table B. Transcription factors involved in mushroom formation**

| Protein name | GenBank Access | Length (aa) | Homologs in <i>Tricholoma matsutake</i> | Length (aa) | E-value   | Identity (%) |
|--------------|----------------|-------------|-----------------------------------------|-------------|-----------|--------------|
| Hom2         | XP_003029756.1 | 723         | Trima_14430                             | 679         | 2.49e-57  | 33.4         |
| Bri1         | XP_003038897.1 | 776         | Trima_08826                             | 932         | 1.99e-159 | 39.2         |
| Fst4         | XP_003034563.1 | 826         | Trima_15097                             | 859         | 0.0       | 45.1         |
| C2H2         | XP_003026630.1 | 360         | Trima_03635                             | 486         | 7.59e-32  | 61.9         |
| Fst3         | XP_003031320.1 | 1120        | Trima_16495                             | 1056        | 0.0       | 64.8         |
| Gat1         | XP_003036589.1 | 449         | Trima_00186                             | 527         | 6.07e-66  | 39.1         |
| Hom1         | XP_003030056.1 | 316         | Trima_12069                             | 379         | 7.22e-31  | 75.6         |

**Table C. The summary of genome sequencing**

| Platform         | Insert size (bp) | Number of reads | Average read length (bp) | Total bases (bp) |
|------------------|------------------|-----------------|--------------------------|------------------|
| HiSeq paired-end | 500              | 99,204,510      | 100                      | 10,019,655,510   |
| HiSeq mate pair  | 5,000            | 310,061,732     | 100                      | 31,316,234,932   |
| MiSeq paired-end | 250              | 24,712,074      | 250                      | 6,165,993,276    |

**Table D. Transposable element Pfam domains**

| Pfam ID | Pfam description                                     |
|---------|------------------------------------------------------|
| PF00075 | RNase H                                              |
| PF00078 | Reverse transcriptase (RNA-dependent DNA polymerase) |
| PF00665 | Integrase core domain                                |
| PF02925 | Bacteriophage scaffolding protein D                  |
| PF02992 | Transposase family tnp2                              |
| PF03184 | DDE superfamily endonuclease                         |
| PF03221 | Tc5 transposase DNA-binding domain                   |
| PF03732 | Retrotransposon gag protein                          |
| PF04687 | Microvirus H protein (pilot protein)                 |
| PF05699 | hAT family C-terminal dimerisation region            |
| PF05840 | Bacteriophage replication gene A protein (GPA)       |
| PF05970 | PIF1-like helicase                                   |
| PF07727 | Reverse transcriptase (RNA-dependent DNA polymerase) |
| PF08283 | Geminivirus rep protein central domain               |
| PF08284 | Retroviral aspartyl protease                         |
| PF10551 | MULE transposase domain                              |
| PF13358 | DDE superfamily endonuclease                         |
| PF13359 | DDE superfamily endonuclease                         |
| PF13456 | Reverse transcriptase-like                           |
| PF13837 | Myb/SANT-like DNA-binding domain                     |
| PF13976 | GAG-pre-integrase domain                             |
| PF14214 | Helitron helicase-like domain at N-terminus          |
| PF14223 | gag-polypeptide of LTR copia-type                    |
| PF14529 | Endonuclease-reverse transcriptase                   |



**Table E. Genomes used for comparative analysis**

| Species                                                 | Order            | GenBank ID      | Ecotype            | Number of genes | Genome Size (Mbp) |
|---------------------------------------------------------|------------------|-----------------|--------------------|-----------------|-------------------|
| <i>Agaricus bisporus</i> var. <i>bisporus</i> H97       | Agaricales       | GCF_000300575.1 | Saprotroph         | 10,448          | 30.2              |
| <i>Agaricus bisporus</i> var. <i>burnettii</i> JB137-S8 | Agaricales       | GCF_000300555.1 | Saprotroph         | 11,278          | 32.6              |
| <i>Amanita muscaria</i> Koide BX008                     | Agaricales       | GCA_000827485.1 | Ectomycorrhizal    | 18,093          | 40.7              |
| <i>Auricularia subglabra</i> TFB-10046 SS5              | Auriculariales   | GCF_000265015.1 | White-rot          | 23,555          | 74.9              |
| <i>Botryobasidium botryosum</i> FD-172 SS1              | Cantharellales   | GCA_000697705.1 | White-rot          | 16,502          | 46.7              |
| <i>Coprinopsis cinerea</i> okayama7#130                 | Agaricales       | GCF_000182895.1 | Saprotroph         | 13,356          | 36.2              |
| <i>Cylindrobasidium torrendii</i> FP15055 ss-10         | Agaricales       | GCA_000934385.1 | White-rot          | 13,936          | 31.6              |
| <i>Exidia glandulosa</i> HHB12029                       | Auriculariales   | GCA_001632375.1 | Saprotroph         | 26,690          | 78.2              |
| <i>Fibularhizoctonia</i> sp. CBS 109695                 | Atheliales       | GCA_001630335.1 | Saprotroph         | 32,854          | 95.1              |
| <i>Fistulina hepatica</i> ATCC 64428                    | Agaricales       | GCA_000934395.1 | Brown-rot          | 11,244          | 33.8              |
| <i>Fomitiporia mediterranea</i> MF3/22                  | Hymenochaetales  | GCF_000271605.1 | White-rot          | 11,338          | 63.4              |
| <i>Fomitopsis pinicola</i> FP-58527 SS1                 | Polyporales      | GCA_000344655.2 | Brown-rot          | 13,852          | 41.6              |
| <i>Galerina marginata</i> CBS 339.88                    | Agaricales       | GCA_000697645.1 | White-rot          | 21,391          | 59.4              |
| <i>Gloeophyllum trabeum</i> ATCC 11539                  | Gloeophyllales   | GCF_000344685.1 | Brown-rot          | 11,755          | 37.2              |
| <i>Gymnopus luxurians</i> FD-317 M1                     | Agaricales       | GCA_000827265.1 | Saprotroph         | 22,046          | 66.3              |
| <i>Hebeloma cylindrosporum</i> h7                       | Agaricales       | GCA_000827355.1 | Ectomycorrhizal    | 15,376          | 38.2              |
| <i>Heterobasidion irregulare</i> TC 32-1                | Russulales       | GCF_000320585.1 | Plant pathogen     | 13,275          | 33.6              |
| <i>Hypholoma sublateritium</i> FD-334 SS-4              | Agaricales       | GCA_000827495.1 | White-rot          | 17,771          | 48                |
| <i>Jaapia argillacea</i> MUCL 33604                     | Jaapiales        | GCA_000697665.1 | White-rot          | 16,375          | 45                |
| <i>Laccaria amethystina</i> LaAM-08-1                   | Agaricales       | GCA_000827195.1 | Ectomycorrhizal    | 21,033          | 52.2              |
| <i>Laccaria bicolor</i> S238N-H82                       | Agaricales       | GCF_000143565.1 | Ectomycorrhizal    | 18,215          | 64.9              |
| <i>Moniliophthora roreri</i> MCA 2997                   | Agaricales       | GCF_000488995.1 | Plant pathogen     | 17,910          | 52.2              |
| <i>Neolentinus lepideus</i> HHB14362 ss-1               | Gloeophyllales   | GCA_001632425.1 | Saprotroph         | 13,157          | 35.6              |
| <i>Peniophora</i> sp. CONT                              | Russulales       | GCA_001632445.1 | White-rot          | 18,945          | 46                |
| <i>Piloderma croceum</i> F 1598                         | Atheliales       | GCA_000827315.1 | Ectomycorrhizal    | 21,524          | 59.3              |
| <i>Pleurotus ostreatus</i> PC15                         | Agaricales       | GCA_000697685.1 | White-rot          | 12,296          | 34.3              |
| <i>Plicaturopsis crispa</i> FD-325 SS-3                 | Amylocorticiales | GCA_000827205.1 | White-rot          | 13,617          | 34.5              |
| <i>Punctularia strigosozonata</i> HHB-11173 SS5         | Corticiales      | GCF_000264995.1 | White-rot          | 11,540          | 34.2              |
| <i>Pycnoporus coccineus</i> BRFM310                     | Polyporales      | GCA_002092935.1 | White-rot          | 12,693          | 32.8              |
| <i>Rhizoctonia solani</i> AG-1 IA                       | Cantharellales   | GCA_000334115.1 | Plant pathogen     | 10,489          | 36.9              |
| <i>Schizophyllum commune</i> H4-8                       | Agaricales       | GCF_000143185.1 | White-rot          | 13,194          | 38.5              |
| <i>Scleroderma citrinum</i> Foug A                      | Boletales        | GCA_000827425.1 | Ectomycorrhizal    | 20,995          | 56.1              |
| <i>Serendipita indica</i> DSM 11827                     | Sebacinales      | GCA_000313545.1 | Endophyte          | 11,791          | 25                |
| <i>Serendipita vermifera</i> MAFF 305830                | Sebacinales      | GCA_000827415.1 | Orchid mycorrhizal | 15,245          | 38.1              |

|                                               |                |                 |                 |        |      |
|-----------------------------------------------|----------------|-----------------|-----------------|--------|------|
| <i>Sistotremastrum niveocreum</i> HHB9708     | Trechisporales | GCA_001630475.1 | Saprotroph      | 13,076 | 35.4 |
| <i>Sistotremastrum suecicum</i> HHB10207 ss-3 | Trechisporales | GCA_001632355.1 | Saprotroph      | 13,654 | 33.9 |
| <i>Suillus luteus</i> UH-Slu-Lm8-n1           | Boletales      | GCA_000827255.1 | Ectomycorrhizal | 18,303 | 37   |

---

**Table F. Total bases and read counts for the three developmental stages of *Tricholoma matsutake***

| Development stage | Total bases    | Read count  | N (%) | GC (%) | Q20 (%) | Q30 (%) |
|-------------------|----------------|-------------|-------|--------|---------|---------|
| Hyphae            | 10,954,625,640 | 108,461,640 | 0.004 | 49.58  | 94.12   | 86.92   |
| Primordia         | 13,424,362,278 | 132,914,478 | 0.004 | 49.85  | 93.95   | 86.82   |
| Fruiting Body     | 12,872,445,152 | 127,449,952 | 0.004 | 49.79  | 94.34   | 87.42   |

**Table G. Repeat families predicted by RepeatModeler**

| Repeat family | Number of families | Average length (bp) |
|---------------|--------------------|---------------------|
| LTR           | 289                | 1832                |
| DNA           | 130                | 2398                |
| LINE          | 39                 | 2228                |
| RC            | 22                 | 2103                |
| Simple_repeat | 14                 | 756                 |
| buffer        | 2                  | 2098                |
| Unknown       | 1879               | 676                 |

## Supplementary references

- 1 Kouzminova, E. & Selker, E. U. *dim-2* encodes a DNA methyltransferase responsible for all known cytosine methylation in *Neurospora*. *The EMBO journal* **20**, 4309-4323, doi:10.1093/emboj/20.15.4309 (2001).
- 2 Malagnac, F. *et al.* A gene essential for de novo methylation and development in *Ascobolus* reveals a novel type of eukaryotic DNA methyltransferase structure. *Cell* **91**, 281-290 (1997).
- 3 Chernov, A. V., Vollmayr, P., Walter, J. & Trautner, T. A. *Masc2*, a C5-DNA-methyltransferase from *Ascobolus immersus* with similarity to methyltransferases of higher organisms. *Biological chemistry* **378**, 1467-1473 (1997).
- 4 Galagan, J. E. *et al.* The genome sequence of the filamentous fungus *Neurospora crassa*. *Nature* **422**, 859-868, doi:10.1038/nature01554 (2003).
- 5 Catalanotto, C., Azzalin, G., Macino, G. & Cogoni, C. Gene silencing in worms and fungi. *Nature* **404**, 245, doi:10.1038/35005169 (2000).
