# Supplementary material for: Unusual genome expansion and transcription suppression in ectomycorrhizal Tricholoma matsutake by insertions of transposable elements
Source: PubMed Central journal article supplement (PMC6980582; doi:10.1371/journal.pone.0227923), 2020-01-24
Supplement: pone.0227923.s002.pdf [file pone.0227923.s002.pdf]

**Table A. Target proteins responsible for genome defense by fungi**

| <b>Mechanism</b>                  | <b>Name</b>           | <b>Description</b>                  | <b>Source organism</b>    | <b>Length (aa)</b> | <b>GenBank accession</b> |
|-----------------------------------|-----------------------|-------------------------------------|---------------------------|--------------------|--------------------------|
| Repeat-induced point mutation     | Rid/Dim2 <sup>1</sup> | DNA methyltransferase               | <i>Neurospora crassa</i>  | 1454               | AAK49954.1               |
|                                   | Masc1 <sup>2</sup>    | C5-DNA methyltransferase            | <i>Ascobolus immersus</i> | 537                | AAC49849.1               |
|                                   | Masc2 <sup>3</sup>    | C5-DNA methyltransferase            | <i>Ascobolus immersus</i> | 1356               | AAC03766.1               |
| Meiotic silencing by unpaired DNA | Sad-1 <sup>4</sup>    | RNA dependent RNA polymerase        | <i>Neurospora crassa</i>  | 1638               | EAA35012.3               |
|                                   | Sms-3 <sup>4</sup>    | dicer-like protein                  | <i>Neurospora crassa</i>  | 1584               | EAA32662.1               |
|                                   | Sms-2 <sup>4</sup>    | meiotic silencing suppressor        | <i>Neurospora crassa</i>  | 989                | EAA29350.1               |
| Quelling                          | Qde-1 <sup>4</sup>    | RNA-dependent RNA polymerase        | <i>Neurospora crassa</i>  | 1402               | EAA29811.1               |
|                                   | Dcl2 <sup>4</sup>     | dicer-like protein                  | <i>Neurospora crassa</i>  | 1396               | XP_963538.3              |
|                                   | Qde2 <sup>5</sup>     | post-transcriptional gene silencing | <i>Neurospora crassa</i>  | 938                | AAF43641.1               |

**Table B. Transcription factors involved in mushroom formation**

| Protein name | GenBank Access | Length (aa) | Homologs in <i>Tricholoma matsutake</i> | Length (aa) | E-value   | Identity (%) |
|--------------|----------------|-------------|-----------------------------------------|-------------|-----------|--------------|
| Hom2         | XP_003029756.1 | 723         | Trima_14430                             | 679         | 2.49e-57  | 33.4         |
| Bri1         | XP_003038897.1 | 776         | Trima_08826                             | 932         | 1.99e-159 | 39.2         |
| Fst4         | XP_003034563.1 | 826         | Trima_15097                             | 859         | 0.0       | 45.1         |
| C2H2         | XP_003026630.1 | 360         | Trima_03635                             | 486         | 7.59e-32  | 61.9         |
| Fst3         | XP_003031320.1 | 1120        | Trima_16495                             | 1056        | 0.0       | 64.8         |
| Gat1         | XP_003036589.1 | 449         | Trima_00186                             | 527         | 6.07e-66  | 39.1         |
| Hom1         | XP_003030056.1 | 316         | Trima_12069                             | 379         | 7.22e-31  | 75.6         |

**Table C. The summary of genome sequencing**

| Platform         | Insert size (bp) | Number of reads | Average read length (bp) | Total bases (bp) |
|------------------|------------------|-----------------|--------------------------|------------------|
| HiSeq paired-end | 500              | 99,204,510      | 100                      | 10,019,655,510   |
| HiSeq mate pair  | 5,000            | 310,061,732     | 100                      | 31,316,234,932   |
| MiSeq paired-end | 250              | 24,712,074      | 250                      | 6,165,993,276    |

**Table D. Transposable element Pfam domains**

| Pfam ID | Pfam description                                     |
|---------|------------------------------------------------------|
| PF00075 | RNase H                                              |
| PF00078 | Reverse transcriptase (RNA-dependent DNA polymerase) |
| PF00665 | Integrase core domain                                |
| PF02925 | Bacteriophage scaffolding protein D                  |
| PF02992 | Transposase family tnp2                              |
| PF03184 | DDE superfamily endonuclease                         |
| PF03221 | Tc5 transposase DNA-binding domain                   |
| PF03732 | Retrotransposon gag protein                          |
| PF04687 | Microvirus H protein (pilot protein)                 |
| PF05699 | hAT family C-terminal dimerisation region            |
| PF05840 | Bacteriophage replication gene A protein (GPA)       |
| PF05970 | PIF1-like helicase                                   |
| PF07727 | Reverse transcriptase (RNA-dependent DNA polymerase) |
| PF08283 | Geminivirus rep protein central domain               |
| PF08284 | Retroviral aspartyl protease                         |
| PF10551 | MULE transposase domain                              |
| PF13358 | DDE superfamily endonuclease                         |
| PF13359 | DDE superfamily endonuclease                         |
| PF13456 | Reverse transcriptase-like                           |
| PF13837 | Myb/SANT-like DNA-binding domain                     |
| PF13976 | GAG-pre-integrase domain                             |
| PF14214 | Helitron helicase-like domain at N-terminus          |
| PF14223 | gag-polypeptide of LTR copia-type                    |
| PF14529 | Endonuclease-reverse transcriptase                   |

**Table E. Genomes used for comparative analysis**

| Species                                                 | Order            | GenBank ID      | Ecotype            | Number of genes | Genome Size (Mbp) |
|---------------------------------------------------------|------------------|-----------------|--------------------|-----------------|-------------------|
| <i>Agaricus bisporus</i> var. <i>bisporus</i> H97       | Agaricales       | GCF_000300575.1 | Saprotroph         | 10,448          | 30.2              |
| <i>Agaricus bisporus</i> var. <i>burnettii</i> JB137-S8 | Agaricales       | GCF_000300555.1 | Saprotroph         | 11,278          | 32.6              |
| <i>Amanita muscaria</i> Koide BX008                     | Agaricales       | GCA_000827485.1 | Ectomycorrhizal    | 18,093          | 40.7              |
| <i>Auricularia subglabra</i> TFB-10046 SS5              | Auriculariales   | GCF_000265015.1 | White-rot          | 23,555          | 74.9              |
| <i>Botryobasidium botryosum</i> FD-172 SS1              | Cantharellales   | GCA_000697705.1 | White-rot          | 16,502          | 46.7              |
| <i>Coprinopsis cinerea</i> okayama7#130                 | Agaricales       | GCF_000182895.1 | Saprotroph         | 13,356          | 36.2              |
| <i>Cylindrobasidium torrendii</i> FP15055 ss-10         | Agaricales       | GCA_000934385.1 | White-rot          | 13,936          | 31.6              |
| <i>Exidia glandulosa</i> HHB12029                       | Auriculariales   | GCA_001632375.1 | Saprotroph         | 26,690          | 78.2              |
| <i>Fibularhizoctonia</i> sp. CBS 109695                 | Atheliales       | GCA_001630335.1 | Saprotroph         | 32,854          | 95.1              |
| <i>Fistulina hepatica</i> ATCC 64428                    | Agaricales       | GCA_000934395.1 | Brown-rot          | 11,244          | 33.8              |
| <i>Fomitiporia mediterranea</i> MF3/22                  | Hymenochaetales  | GCF_000271605.1 | White-rot          | 11,338          | 63.4              |
| <i>Fomitopsis pinicola</i> FP-58527 SS1                 | Polyporales      | GCA_000344655.2 | Brown-rot          | 13,852          | 41.6              |
| <i>Galerina marginata</i> CBS 339.88                    | Agaricales       | GCA_000697645.1 | White-rot          | 21,391          | 59.4              |
| <i>Gloeophyllum trabeum</i> ATCC 11539                  | Gloeophyllales   | GCF_000344685.1 | Brown-rot          | 11,755          | 37.2              |
| <i>Gymnopus luxurians</i> FD-317 M1                     | Agaricales       | GCA_000827265.1 | Saprotroph         | 22,046          | 66.3              |
| <i>Hebeloma cylindrosporum</i> h7                       | Agaricales       | GCA_000827355.1 | Ectomycorrhizal    | 15,376          | 38.2              |
| <i>Heterobasidion irregulare</i> TC 32-1                | Russulales       | GCF_000320585.1 | Plant pathogen     | 13,275          | 33.6              |
| <i>Hypholoma sublateritium</i> FD-334 SS-4              | Agaricales       | GCA_000827495.1 | White-rot          | 17,771          | 48                |
| <i>Jaapia argillacea</i> MUCL 33604                     | Jaapiales        | GCA_000697665.1 | White-rot          | 16,375          | 45                |
| <i>Laccaria amethystina</i> LaAM-08-1                   | Agaricales       | GCA_000827195.1 | Ectomycorrhizal    | 21,033          | 52.2              |
| <i>Laccaria bicolor</i> S238N-H82                       | Agaricales       | GCF_000143565.1 | Ectomycorrhizal    | 18,215          | 64.9              |
| <i>Moniliophthora roreri</i> MCA 2997                   | Agaricales       | GCF_000488995.1 | Plant pathogen     | 17,910          | 52.2              |
| <i>Neolentinus lepideus</i> HHB14362 ss-1               | Gloeophyllales   | GCA_001632425.1 | Saprotroph         | 13,157          | 35.6              |
| <i>Peniophora</i> sp. CONT                              | Russulales       | GCA_001632445.1 | White-rot          | 18,945          | 46                |
| <i>Piloderma croceum</i> F 1598                         | Atheliales       | GCA_000827315.1 | Ectomycorrhizal    | 21,524          | 59.3              |
| <i>Pleurotus ostreatus</i> PC15                         | Agaricales       | GCA_000697685.1 | White-rot          | 12,296          | 34.3              |
| <i>Plicaturopsis crispa</i> FD-325 SS-3                 | Amylocorticiales | GCA_000827205.1 | White-rot          | 13,617          | 34.5              |
| <i>Punctularia strigosozonata</i> HHB-11173 SS5         | Corticiales      | GCF_000264995.1 | White-rot          | 11,540          | 34.2              |
| <i>Pycnoporus coccineus</i> BRFM310                     | Polyporales      | GCA_002092935.1 | White-rot          | 12,693          | 32.8              |
| <i>Rhizoctonia solani</i> AG-1 IA                       | Cantharellales   | GCA_000334115.1 | Plant pathogen     | 10,489          | 36.9              |
| <i>Schizophyllum commune</i> H4-8                       | Agaricales       | GCF_000143185.1 | White-rot          | 13,194          | 38.5              |
| <i>Scleroderma citrinum</i> Foug A                      | Boletales        | GCA_000827425.1 | Ectomycorrhizal    | 20,995          | 56.1              |
| <i>Serendipita indica</i> DSM 11827                     | Sebacinales      | GCA_000313545.1 | Endophyte          | 11,791          | 25                |
| <i>Serendipita vermifera</i> MAFF 305830                | Sebacinales      | GCA_000827415.1 | Orchid mycorrhizal | 15,245          | 38.1              |

|                                               |                |                 |                 |        |      |
|-----------------------------------------------|----------------|-----------------|-----------------|--------|------|
| <i>Sistotremastrum niveocreum</i> HHB9708     | Trechisporales | GCA_001630475.1 | Saprotroph      | 13,076 | 35.4 |
| <i>Sistotremastrum suecicum</i> HHB10207 ss-3 | Trechisporales | GCA_001632355.1 | Saprotroph      | 13,654 | 33.9 |
| <i>Suillus luteus</i> UH-Slu-Lm8-n1           | Boletales      | GCA_000827255.1 | Ectomycorrhizal | 18,303 | 37   |

---

**Table F. Total bases and read counts for the three developmental stages of *Tricholoma matsutake***

| Development stage | Total bases    | Read count  | N (%) | GC (%) | Q20 (%) | Q30 (%) |
|-------------------|----------------|-------------|-------|--------|---------|---------|
| Hyphae            | 10,954,625,640 | 108,461,640 | 0.004 | 49.58  | 94.12   | 86.92   |
| Primordia         | 13,424,362,278 | 132,914,478 | 0.004 | 49.85  | 93.95   | 86.82   |
| Fruiting Body     | 12,872,445,152 | 127,449,952 | 0.004 | 49.79  | 94.34   | 87.42   |

**Table G. Repeat families predicted by RepeatModeler**

| Repeat family | Number of families | Average length (bp) |
|---------------|--------------------|---------------------|
| LTR           | 289                | 1832                |
| DNA           | 130                | 2398                |
| LINE          | 39                 | 2228                |
| RC            | 22                 | 2103                |
| Simple_repeat | 14                 | 756                 |
| buffer        | 2                  | 2098                |
| Unknown       | 1879               | 676                 |



## Supplementary references

- 1 Kouzminova, E. & Selker, E. U. *dim-2* encodes a DNA methyltransferase responsible for all known cytosine methylation in *Neurospora*. *The EMBO journal* **20**, 4309-4323, doi:10.1093/emboj/20.15.4309 (2001).
- 2 Malagnac, F. *et al.* A gene essential for de novo methylation and development in *Ascobolus* reveals a novel type of eukaryotic DNA methyltransferase structure. *Cell* **91**, 281-290 (1997).
- 3 Chernov, A. V., Vollmayr, P., Walter, J. & Trautner, T. A. *Masc2*, a C5-DNA-methyltransferase from *Ascobolus immersus* with similarity to methyltransferases of higher organisms. *Biological chemistry* **378**, 1467-1473 (1997).
- 4 Galagan, J. E. *et al.* The genome sequence of the filamentous fungus *Neurospora crassa*. *Nature* **422**, 859-868, doi:10.1038/nature01554 (2003).
- 5 Catalanotto, C., Azzalin, G., Macino, G. & Cogoni, C. Gene silencing in worms and fungi. *Nature* **404**, 245, doi:10.1038/35005169 (2000).
